# Supplementary material
Source: ML conference proceedings conference paper supplement (https://proceedings.neurips.cc/paper_files/paper/2016/hash/b51a15f382ac914391a58850ab343b00-Abstract.html)
Supplement: Supplementary file [file b51a15f382ac914391a58850ab343b00-Supplemental.zip]

## 7 Appendix

We first state the large deviation inequality for vector-valued martingales, which is the generalization of Azuma-Hoeffding inequality for scalar valued martingales.

**Theorem 1.8 of [13]:** Let  $X_0, X_1, \dots, X_m$  be a weak martingale sequence taking values in euclidean space  $\mathbb{R}^d$ , with  $\mathbb{E}[X_i|X_{i-1}] = X_{i-1}$ . Let  $X_0 = 0$  and  $\|X_i - X_{i-1}\|_2 \leq 1$ , for  $i = 1, 2, \dots, m$ . Then, for every  $\epsilon > 0$ ,

$$\Pr[\|X_m\|_2 \geq \epsilon] < 2e^2 e^{-\frac{\epsilon^2}{m}} \quad (8)$$

We use the concentration inequality to get a uniform confidence bound, over the space of learner's action, on the deviation of estimated reward from true reward, after each estimate of mean reward vector is produced.

**Lemma 5.** *At the end of exploration phase within phase  $b$ ,  $b = 1, 2, \dots$ , of Algorithm PEGE, the*

*estimator of reward vector  $\theta_p^*$  is  $\hat{\theta}(b) = \frac{\sum_{i=1}^b \sum_{j=1}^{i^\beta} \tilde{\theta}_{j,i}}{\sum_{j=1}^b j^\beta}$ . Then,  $\forall \eta > 0$ ,*

$$\Pr[\forall x \in \mathcal{X} : |\bar{r}(x, \hat{\theta}(b)) - \bar{r}(x, \theta_p^*)| \leq \eta] \geq 1 - 2e^2 e^{-\frac{-(\sum_{i=1}^b 1 \cdot i^\beta) \eta^2}{R^2 \beta_\sigma^2}} \quad (9)$$

where  $\beta_\sigma$  is the constant as defined in Eq. 3 and  $R$  is the Lipschitz constant defined in Assumption 3.

*Proof.* Let  $\{X_{i,j}\}_{j=1, \dots, i^\beta, i=1, \dots, b}$  be a sequence of random vectors, defined as follows:

$$X_{i,j} = \frac{\sum_{i'=1}^{i-1} \sum_{j'=1}^{i'^\beta} \theta_p^* + \sum_{k=1}^j \theta_p^* - (\sum_{i'=1}^{i-1} \sum_{j'=1}^{i'^\beta} \tilde{\theta}_{j',i'} + \sum_{k=1}^j \tilde{\theta}_{k,i})}{\sum_{i''=1}^b \sum_{j''=1}^{(i'')^\beta} \beta_\sigma} \quad (10)$$

It can be checked that the  $\ell_2$  norm of the difference between any two consecutive random vectors is bounded by a constant. That is,  $\|X_{i,j} - X_{i,j-1}\|_2 = \frac{\|\theta_p^* - \tilde{\theta}_{j,i}\|_2}{\sum_{i''=1}^b \sum_{j''=1}^{(i'')^\beta} \beta_\sigma} \leq \frac{1}{\sum_{i''=1}^b (i'')^\beta}$  and

$$\|X_{i+1,1} - X_{i,i^\beta}\|_2 \frac{\|\theta_p^* - \tilde{\theta}_{1,i+1}\|_2}{\sum_{i''=1}^b \sum_{j''=1}^{(i'')^\beta} \beta_\sigma} \leq \frac{1}{\sum_{i''=1}^b (i'')^\beta}.$$

Also,  $\tilde{\theta}_{j,i}$  is independent of all estimators formed before  $\tilde{\theta}_{j,i}$  in Algorithm PEGE. Thus,

$$\begin{aligned} \mathbb{E}[X_{i,j} - X_{i,j-1} | X_{i,j-1}] &= \mathbb{E} \left[ \frac{\theta_p^* - \tilde{\theta}_{j,i}}{\sum_{i''=1}^b \sum_{j''=1}^{(i'')^\beta} \beta_\sigma} | X_{i,j-1} \right] \\ &= \mathbb{E} \left[ \frac{\theta_p^* - \tilde{\theta}_{j,i}}{\sum_{i''=1}^b \sum_{j''=1}^{(i'')^\beta} \beta_\sigma} \right] = 0 \end{aligned} \quad (11)$$

Thus,  $\{X_{i,j}\}_{j=1, \dots, i^\beta, i=1, \dots, b}$  satisfy the criteria of weak martingale sequence and hence, by the large deviation inequality of vector valued martingales, we have,

$$\forall \epsilon > 0, \Pr[\|X_{b,b^\beta}\|_2 \geq \epsilon] < 2e^2 e^{-\left( \frac{-\epsilon^2}{\frac{\sum_{i=1}^b \sum_{j=1}^{i^\beta} 1}{(\sum_{i=1}^b i^\beta)^2}} \right)} = 2e^2 e^{-\epsilon^2 \sum_{i=1}^b i^\beta}.$$

Now, it can be clearly seen that  $\|\theta_p^* - \hat{\theta}(b)\|_2 = \beta_\sigma \|X_{b,b^\beta}\|_2$  and let  $\eta = \beta_\sigma \epsilon$ . Then,  $\forall \eta > 0$ , we get

$$\Pr[\|\theta_p^* - \hat{\theta}(b)\|_2 \geq \eta] \leq 2e^2 e^{-\frac{-(\sum_{i=1}^b i^\beta) \eta^2}{\beta_\sigma^2}}.$$

Using the Lipschitz property of expected reward function (Assumption 3), we have

$$\begin{aligned} \Pr(\exists x \in \mathcal{X} : |\bar{r}(x, \hat{\theta}(b)) - \bar{r}(x, \theta_p^*)| \geq \eta) &\leq \Pr(R \cdot \|\theta_p^* - \hat{\theta}(b)\|_2 \geq \eta) \\ &\leq 2e^2 e^{-\frac{(\sum_{i=1}^b i^\beta) \eta^2}{R^2 \beta_\sigma^2}} \end{aligned} \quad (12)$$

Taking complement of the event completes the proof.  $\square$

## 7.1 Proof of Results in Section 3

### 7.1.1 Proof of Theorem 1

We first restate the theorem.

**Distribution Independent Regret:** When Algorithm PEGE is initialized with the parameters  $C(a) = \log a$ ,  $\alpha = 1/2$  and  $\beta = 0$ , and the online game is played over  $T$  rounds, we get the following bound on expected regret:

$$R(T) \leq R_{\max} |\sigma| T^{2/3} + 2R\beta_\sigma T^{2/3} \sqrt{\log 2e^2 + 2 \log T} + R_{\max} \quad (13)$$

where  $\beta_\sigma$  is the constant as defined in Eq. 3.

*Proof.* Let Algorithm PEGE run for  $K$  phases, with parameters initialized as  $C(a) = \log a$ ,  $\alpha = 1/2$  and  $\beta = 0$ .

**Exploration regret:** During every exploration phase, the expected regret is bounded by  $|\sigma| R_{\max}$ , where  $R_{\max}$  is as given in Assumption 3. Thus, total expected regret due to exploration is  $K|\sigma| R_{\max}$ .

**Exploitation regret:** Let  $x^* \in \arg\max_{x \in \mathcal{X}} \bar{r}(x, \theta_p^*)$  and  $x(b) \in \arg\max_{x \in \mathcal{X}} \bar{r}(x, \hat{\theta}(b))$ . During every exploitation round within phase  $b$  of Algorithm PEGE, the expected regret is  $|\bar{r}(x(b), \theta_p^*) - \bar{r}(x^*, \theta_p^*)|$ .

Now, from Lemma 5, with  $\beta = 0$ , the following holds w.p.  $\geq 1 - \delta_b$ ,

$$\forall x, |\bar{r}(x, \theta_p^*) - \bar{r}(x, \hat{\theta}(b))| \leq \underbrace{\sqrt{\frac{R^2 \beta_\sigma^2 \log(\frac{2e^2}{\delta_b})}{b}}}_{\eta_b} \quad (14)$$

Then, w.p.  $\geq 1 - \delta_b$ , the following event holds true:  $|\bar{r}(x^*, \theta_p^*) - \bar{r}(x(b), \theta_p^*)| \leq 2\eta_b$ , as explained:

$$\begin{aligned} \bar{r}(x^*, \theta_p^*) &\leq \bar{r}(x^*, \hat{\theta}(b)) + \eta_b \text{ from Eq. 14} \\ &\leq \bar{r}(x(b), \hat{\theta}(b)) + \eta_b \\ &\leq \bar{r}(x(b), \theta_p^*) + 2\eta_b \text{ from Eq. 14} \end{aligned}$$

Thus, the event  $|\bar{r}(x^*, \theta_p^*) - \bar{r}(x(b), \theta_p^*)| \leq 2\eta_b$  holds true w.p.  $\geq 1 - \delta_b$ , for every fixed phase  $b$ .

Then, w.p.  $\geq 1 - \sum_{i=1}^K \delta_i$ , the following holds true:

$$\forall b, |\bar{r}(x^*, \theta_p^*) - \bar{r}(x(b), \theta_p^*)| \leq 2\eta_b$$

Note that the expected regret per round is always bounded by  $R_{\max}$  (since expected reward is bounded by  $R_{\max}$ ).

The number of rounds of exploitation in phase  $b$  is  $b^\alpha$ . Hence, the total expected regret due to exploitation, over  $K$  phases is:

$$\sum_{i=1}^K \left( \underbrace{\left( 1 - \sum_{j=1}^K \delta_j \right) \frac{2R\beta_\sigma \sqrt{\log(2e^2/\delta_i)}}{\sqrt{i}} + \left( \sum_{j=1}^K \delta_j \right) R_{\max}}_{\text{expected regret per exploitation round}} \right) i^\alpha$$

Taking  $\delta_1 = \delta_2 = \dots = \delta_K = \delta$ , and summing over exploration and exploitation regret over  $K$  phases, we get

$$R(T) \leq K|\sigma|R_{max} + \sum_{i=1}^K \left( (1 - K\delta) \frac{2R\beta_\sigma \sqrt{\log(2e^2/\delta)}}{\sqrt{i}} + (K\delta)R_{max} \right) i^\alpha \quad (15)$$

Using the inequality  $\sum_{i=1}^K i^y \leq \int_0^K i^y dy \leq K^{y+1}$ , we get expected regret:

$$R(T) \leq K|\sigma|R_{max} + (1 - K\delta)2R\beta_\sigma \sqrt{\log(2e^2/\delta)} K^{\alpha+1/2} + K\delta R_{max} K^{\alpha+1} \quad (16)$$

Now, we relate  $K$  to total time  $T$  as:  $T = |\sigma|K + \sum_{i=1}^K i^\alpha \sim K^{\alpha+1}$ , for large  $K$ .

Hence  $K \sim T^{\frac{1}{1+\alpha}}$ . Substituting value of  $K$  in Eq 16, and taking  $\alpha = 1/2$  and  $\delta = \frac{1}{KT}$  gives us the required bound on expected regret.  $\square$

Our next lemma shows that as the number of phases  $b$  grows in Algorithm PEGE, the probability of selecting a sub-optimal arm for greedy exploitation shrinks.

**Lemma 6.** *At the end of exploration phase within phase  $b$ ,  $b = 1, 2, \dots$ , the estimator constructed is*

$$\hat{\theta}(b) = \frac{\sum_{i=1}^b \sum_{j=1}^{i^\beta} \hat{\theta}_{j,i}}{\sum_{j=1}^b j^\beta}. \text{ Then the following holds,}$$

$$\Pr(\operatorname{argmax}_{x \in \mathcal{X}} \bar{r}(x, \hat{\theta}(b)) \not\subseteq \operatorname{argmax}_{x \in \mathcal{X}} \bar{r}(x, \theta_p^*)) \leq 2e^2 e^{-\frac{-(\sum_{i=1}^b i^\beta) \Delta^2}{4R^2 \beta_\sigma^2}} \quad (17)$$

*Proof.* Let us assume  $x' \in \operatorname{argmax}_{x \in \mathcal{X}} \bar{r}(x, \hat{\theta}(b))$  such that  $x' \notin \operatorname{argmax}_{x \in \mathcal{X}} \bar{r}(x, \theta_p^*)$ . Let  $x^* \in \operatorname{argmax}_{x \in \mathcal{X}} \bar{r}(x, \theta_p^*)$ . Then, by our assumption,  $\bar{r}(x', \hat{\theta}(b)) \geq \bar{r}(x^*, \hat{\theta}(b))$ . By definition of gap  $\Delta$ , we also have  $\bar{r}(x^*, \theta_p^*) - \bar{r}(x', \theta_p^*) \geq \Delta$ . The two inequalities imply that at least one of the following two inequalities has to hold: either  $|\bar{r}(x^*, \theta_p^*) - \bar{r}(x^*, \hat{\theta}(b))| \geq \frac{\Delta}{2}$  or  $|\bar{r}(x', \hat{\theta}(b)) - \bar{r}(x', \theta_p^*)| \geq \frac{\Delta}{2}$ .

Thus,  $\operatorname{argmax}_{x \in \mathcal{X}} \bar{r}(x, \hat{\theta}(b)) \not\subseteq \operatorname{argmax}_{x \in \mathcal{X}} \bar{r}(x, \theta_p^*) \implies \exists x \in \mathcal{X} : |\bar{r}(x, \theta_p^*) - \bar{r}(x, \hat{\theta}(b))| \geq \frac{\Delta}{2}$ . By using Lemma 5, and substituting  $\eta = \frac{\Delta}{2}$ , we get our result.  $\square$

### 7.1.2 Proof of Theorem 2

We restate the theorem before proving:

**Distribution Dependent Regret:** When Algorithm PEGE is initialized with the parameters  $C(a) = h \cdot a$ , for a tuning parameter  $h > 0$ ,  $\alpha = 1$  and  $\beta = 1$ , and the online game is played over  $T$  rounds, we get the following bound on expected regret:

$$R(T) \leq \sum_{x \in \sigma} \Delta_x \left( \frac{\log T}{h} \right)^2 + \frac{4\sqrt{2\pi}e^2 R \Delta_{max} \beta_\sigma}{\Delta} e^{\frac{h^2 (2R^2 \beta_\sigma^2)}{\Delta^2}}. \quad (18)$$

*Proof.* Let total number of phases that the algorithm runs for be  $K$ . We relate  $K$  to total time  $T$  as (after substituting parameters  $C(a) = h \cdot a$ ,  $\alpha = 1$  and  $\beta = 1$  in Algorithm PEGE):

$$T = \sum_{i=1}^K |\sigma|i + \sum_{i=1}^K e^{hi} \geq e^{hK} \implies K \leq \frac{\log T}{h}.$$

**Exploration regret:** Since we are in distribution dependent setting now, expected exploration regret in each exploration phase is  $\sum_{x \in \sigma} \Delta_x$ . Hence, total expected exploration regret is upper bounded by:

$$\sum_{i=1}^K (\sum_{x \in \sigma} \Delta_x) i = \sum_{x \in \sigma} \Delta_x \frac{K(K+1)}{2} \leq (\sum_{x \in \sigma} \Delta_x) \frac{\log^2 T}{h^2}.$$

**Exploitation regret:** When a sub-optimal arm is picked in an exploitation round, the expected regret in that round is:  $\leq \Delta_{max}$ . Using Lemma 6 with  $\beta = 1$ , the total expected regret due to exploitation over  $K$  phases is upper bounded by:

$$\begin{aligned} \sum_{i=1}^K \underbrace{2e^2 \Delta_{max} e^{hi - \frac{i(i+1)}{2} \frac{\Delta^2}{4R^2\beta_\sigma^2}}}_{\text{expected exploitation regret upper bound in phase } i} &\leq 2e^2 \Delta_{max} \sum_{i=1}^{\infty} e^{hi - \frac{i(i+1)}{2} \frac{\Delta^2}{4R^2\beta_\sigma^2}} \\ &\leq 2e^2 \Delta_{max} \sum_{i=1}^{\infty} e^{hi - \frac{i^2}{2} \frac{\Delta^2}{4R^2\beta_\sigma^2}} \\ &\leq 2e^2 \Delta_{max} \int_{-\infty}^{\infty} e^{hy - \frac{y^2}{2} \frac{\Delta^2}{4R^2\beta_\sigma^2}} dy \end{aligned} \quad (19)$$

The integral is the moment generating function (adjusting for normalization constant) of a gaussian random variable  $Y \in \mathcal{N}(0, \frac{4R^2\beta_\sigma^2}{\Delta^2})$ . Thus, the integral is  $\mathbb{E}[e^{hY}] = e^{\frac{2h^2 R^2 \beta_\sigma^2}{\Delta^2}}$  and total expected regret due to exploitation is upper bounded by:  $\frac{4e^2 \Delta_{max} \sqrt{2\pi} R \beta_\sigma}{\Delta} e^{\frac{2h^2 R^2 \beta_\sigma^2}{\Delta^2}}$ .

Summing over exploration and exploitation regrets completes the proof.  $\square$

## 7.2 Proof of Results in Section 4

The following theorem is about the version of PEGE that Algorithm 3 calls on line 8. It will be needed in the proof of Theorem 4.

**Theorem 7. (Distribution Dependent Regret, version 2)** *When Algorithm 1 is initialized with the parameters  $C(a) = h \cdot a$ , for a tuning parameter  $0 < h < \frac{\Delta^2}{4R^2\beta_\sigma^2}$ ,  $\alpha = 1$  and  $\beta = 0$ , and the online game is played over  $T$  rounds, we get the following bound on expected regret:*

$$R(T) \leq \sum_{x \in \sigma} \Delta_x \frac{\log T}{h} + \frac{2e^2 \Delta_{max}}{\frac{\Delta^2}{4R^2\beta_\sigma^2} - h} \quad (20)$$

**Note:** Compared to Theorem 2, the regret bound has better dependence on  $T$  —  $O(\log T)$  instead of  $O(\log^2 T)$  — but it also has a disadvantage. If the tuning parameter  $h$  is incorrectly set, say  $h \geq \frac{\Delta^2}{4R^2\beta_\sigma^2}$ , then the bound does not even apply.

*Proof.* The proof is similar to proof of Theorem 2. We highlight the key steps:

Let total number of phases that the algorithm runs for be  $K$ . First:  $T = \sum_{i=1}^K |\sigma| + \sum_{i=1}^K e^{hi} \geq e^{hK} \implies K \leq \frac{\log T}{h}$ .

Expected regret due to exploration:  $\sum_{i=1}^K (\sum_{x \in \sigma} \Delta_x) = \sum_{x \in \sigma} \Delta_x K \leq (\sum_{x \in \sigma} \Delta_x) \frac{\log T}{h}$ .

Expected regret due to exploitation: When a sub-optimal arm is picked, expected regret  $\leq \Delta_{max}$ . Using Lemma 6 with  $\beta = 0$ , and tuning parameter  $h < \frac{\Delta^2}{4R^2\beta_\sigma^2}$ , we get total expected regret due to exploitation

$$\begin{aligned} 2e^2 \Delta_{max} \sum_{i=1}^K e^{hi - i \frac{\Delta^2}{4R^2\beta_\sigma^2}} &\leq 2e^2 \Delta_{max} \sum_{i=1}^{\infty} e^{hi - i \frac{\Delta^2}{4R^2\beta_\sigma^2}} \\ &= 2e^2 \Delta_{max} \sum_{i=1}^{\infty} e^{-i(\frac{\Delta^2}{4R^2\beta_\sigma^2} - h)} \\ &\leq 2e^2 \Delta_{max} \int_0^{\infty} e^{-y(\frac{\Delta^2}{4R^2\beta_\sigma^2} - h)} dy \\ &= \frac{2e^2 \Delta_{max}}{\frac{\Delta^2}{4R^2\beta_\sigma^2} - h} \end{aligned} \quad (21)$$

$\square$

### 7.2.1 Proof of Theorem 3

*Proof.* Note that Assumption 1 through Assumption 3 hold. Therefore, from Lemma 5, with  $\beta = 0$  we get, with probability at least  $1 - \delta_b$ ,

$$\forall x, |\bar{r}(x, \theta_p^*) - \bar{r}(x, \hat{\theta}(b))| \leq \sqrt{\frac{R^2 \beta_\sigma^2 \log(\frac{2e^2}{\delta_b})}{b}}$$

Let  $\delta_b = \delta/2b^2$  which implies  $\sum_{b \geq 1} \delta_b = \pi^2 \delta/12 < \delta$ . Thus, setting  $w(b) = \sqrt{\frac{R^2 \beta_\sigma^2 \log(\frac{4e^2 b^2}{\delta})}{b}}$ , the event  $E$  defined as

$$\forall b \geq 1, \forall x \in \mathcal{X}, |\bar{r}(x, \hat{\theta}(b)) - \bar{r}(x, \theta_p^*)| \leq w(b). \quad (22)$$

holds with probability at least  $1 - \delta$ .

1. Note that  $b \geq T_1(\delta)$  implies  $8w(b) < \Delta$ . This is because the latter has the form  $e^{Lb} > Mb$  with  $M = 2e/\delta$  and  $L = \Delta^2/(128R^2\beta_\sigma^2)$ . Setting  $b \geq 2/L \log(2M/L)$  guarantees that  $e^{Lb/2} \geq 2M/L$  which implies that  $e^{Lb} \geq Mb$  since  $e^{Lb/2} \geq 1 + Lb/2 \geq Lb/2$ .

If  $8w(b) < \Delta$  then clearly  $2w(b) < \Delta$ . Let  $x \neq x^*$  be arbitrary. We have the following chain of implications:

$$\begin{aligned} & 2w(b) < \Delta \\ \Rightarrow & 2w(b) < \bar{r}(x^*, \theta_p^*) - \bar{r}(x_-, \theta_p^*) & (\text{def. of } \Delta) \\ \Rightarrow & 2w(b) < \bar{r}(x^*, \theta_p^*) - \bar{r}(x, \theta_p^*) & (\text{Assumption 4}) \\ \Rightarrow & 0 < \bar{r}(x^*, \hat{\theta}(b)) - \bar{r}(x, \hat{\theta}(b)). & (\because E \text{ holds}) \end{aligned}$$

This means that the If condition on line 12 will evaluate to true and  $\hat{x}(b)$  on line 13 will be set to  $x^*$ .

We also have the following chain of implications:

$$\begin{aligned} & 8w(b) < \Delta \\ \Rightarrow & 8w(b) < \bar{r}(x^*, \theta_p^*) - \bar{r}(x_-, \theta_p^*) & (\text{def. of } \Delta) \\ \Rightarrow & 8w(b) < \bar{r}(x^*, \theta_p^*) - \bar{r}(\hat{x}_-(b), \theta_p^*) & (\because \bar{r}(\hat{x}_-(b), \theta_p^*) \leq \bar{r}(x_-, \theta_p^*)) \\ \Rightarrow & 8w(b) < \bar{r}(\hat{x}(b), \theta_p^*) - \bar{r}(\hat{x}_-(b), \theta_p^*) & (\because \hat{x}(b) = x^*) \\ \Rightarrow & 6w(b) < \bar{r}(\hat{x}(b), \hat{\theta}(b)) - \bar{r}(\hat{x}_-(b), \hat{\theta}(b)). & (\because E \text{ holds}) \end{aligned}$$

This means that the If condition on line 15 will evaluate to true and the algorithm will stop and output an estimate  $\hat{\Delta}$ .

Now suppose the algorithm stops and does not output “threshold exceeded” which means that the If conditions on line 12 and line 15 were both true at some episode  $b$ . Let  $x \neq \hat{x}(b)$  be arbitrary. We have the following chain of implications:

$$\begin{aligned} & 6w(b) < \bar{r}(\hat{x}(b), \hat{\theta}(b)) - \bar{r}(\hat{x}_-(b), \hat{\theta}(b)) & (\text{line 15}) \\ \Rightarrow & 6w(b) < \bar{r}(\hat{x}(b), \hat{\theta}(b)) - \bar{r}(x, \hat{\theta}(b)) & (\hat{x}(b) \text{ unique maximizer by line 12}) \\ \Rightarrow & 4w(b) < \bar{r}(\hat{x}(b), \theta_p^*) - \bar{r}(x, \theta_p^*). & (\because E \text{ holds}) \end{aligned}$$

This means, along with Assumption 4, that  $\hat{x}(b) = x^*$ . We also have,

$$\begin{aligned} & 6w(b) < \bar{r}(\hat{x}(b), \hat{\theta}(b)) - \bar{r}(\hat{x}_-(b), \hat{\theta}(b)) & (\text{line 15}) \\ \Rightarrow & 6w(b) < \bar{r}(\hat{x}(b), \hat{\theta}(b)) - \bar{r}(x_-, \hat{\theta}(b)) & (\because \bar{r}(\hat{x}_-(b), \hat{\theta}(b)) \geq \bar{r}(x_-, \hat{\theta}(b))) \\ \Rightarrow & 4w(b) < \bar{r}(\hat{x}(b), \theta_p^*) - \bar{r}(x_-, \theta_p^*) & (\because E \text{ holds}) \\ \Rightarrow & 4w(b) < \bar{r}(x^*, \theta_p^*) - \bar{r}(x_-, \theta_p^*) & (\because \hat{x}(b) = x^*) \\ \Rightarrow & 4w(b) < \Delta. & (\text{def. of } \Delta) \end{aligned}$$

Now we prove that the output  $\hat{\Delta}$  lies in the right range. We have

$$\begin{aligned}
\hat{\Delta} &= \bar{r}(\hat{x}(b), \hat{\theta}(b)) - \bar{r}(\hat{x}_-(b), \hat{\theta}(b)) && \text{(line 16)} \\
&\geq \bar{r}(\hat{x}(b), \theta_p^*) - \bar{r}(\hat{x}_-(b), \theta_p^*) - 2w(b) && (\because E \text{ holds}) \\
&= \bar{r}(x^*, \theta_p^*) - \bar{r}(\hat{x}_-(b), \theta_p^*) - 2w(b) && (\because \hat{x}(b) = x^*) \\
&\geq \bar{r}(x^*, \theta_p^*) - \bar{r}(x_-, \theta_p^*) - 2w(b) && (\because \bar{r}(\hat{x}_-(b), \theta_p^*) \leq \bar{r}(x_-, \theta_p^*)) \\
&\geq \Delta - 2w(b) && \text{(def. of } \Delta) \\
&\geq \frac{\Delta}{2}. && (\because w(b) < \Delta/4)
\end{aligned}$$

Similarly,

$$\begin{aligned}
\hat{\Delta} &= \bar{r}(\hat{x}(b), \hat{\theta}(b)) - \bar{r}(\hat{x}_-(b), \hat{\theta}(b)) && \text{(line 16)} \\
&\leq \bar{r}(\hat{x}(b), \hat{\theta}(b)) - \bar{r}(x_-, \hat{\theta}(b)) && (\because \bar{r}(\hat{x}_-(b), \hat{\theta}(b)) \geq \bar{r}(x_-, \hat{\theta}(b))) \\
&= \bar{r}(x^*, \hat{\theta}(b)) - \bar{r}(x_-, \hat{\theta}(b)) && (\because \hat{x}(b) = x^*) \\
&\leq \bar{r}(x^*, \theta_p^*) - \bar{r}(x_-, \theta_p^*) + 2w(b) && (\because E \text{ holds}) \\
&\leq \Delta + 2w(b) && \text{(def. of } \Delta) \\
&\leq \frac{3\Delta}{2}. && (\because w(b) < \Delta/4)
\end{aligned}$$

2. In this case  $T_0 \leq T_1(\delta)$  but it could still be that the algorithm stops not because the threshold is exceeded but because line 12 and line 15 were true at some episode  $b$ . Clearly  $b < T_0$ , otherwise we would have output “threshold exceeded” and not produced an estimate  $\hat{\Delta}$ . Under the event  $E$ , the previous part shows that if stopping occurs with an estimate  $\hat{\Delta}$ , it must be that  $4w(b) < \Delta$ , i.e.

$$4\sqrt{\frac{R^2 \beta_\sigma^2 \log(\frac{4e^2 b^2}{\delta})}{b}} < \Delta \quad \Rightarrow \quad b > \frac{16R^2 \beta_\sigma^2}{\Delta^2} \log \frac{4e^2}{\delta} = T_2(\delta).$$

This means  $T_0 > b > T_2(\delta)$ .

3. Finally, suppose Assumptions 1 through 3 hold but Assumption 4 fails. Event  $E$  still holds with probability at least  $1 - \delta$ . However, if there are at least two optimal actions then, under  $E$ , their confidence intervals will always overlap and If condition on line 15 will never be true. That means that the algorithm can only stop when the threshold  $T_0$  is exceeded.

□

## 7.2.2 Proof of Theorem 4

*Proof.* We break the proof into the two cases mentioned in the theorem statement.

**Part 1: Assumption 4 fails.** From Theorem 3 we know, that with probability at least  $1 - \delta$ , Algorithm 2 outputs “threshold exceeded” in this case. Because of Eq. (22), we also have, for an optimal action  $x^*$ :

$$|\bar{r}(\hat{x}(T_0), \theta_p^*) - \bar{r}(x^*, \theta_p^*)| \leq 2w(T_0)$$

which implies a total regret of

$$2w(T_0)(T - T_0|\sigma|) \leq 2w(T_0)T$$

in the remaining  $T - T_0|\sigma|$  rounds since we execute line 5. The regret when Algorithm 2 was running is bounded by  $R_{max}T_0|\sigma|$ . On the bad event, which occurs with probability at most  $1 - \delta$ , the regret is at most  $TR_{max}$  giving us a total expected regret of

$$2w(T_0)T + T_0|\sigma|R_{max} + \delta TR_{max} = 2\sqrt{\frac{R^2 \beta_\sigma^2 \log(\frac{4e^2 T_0^2}{\delta})}{T_0}}T + T_0|\sigma|R_{max} + \delta TR_{max}$$
